# Supplementary material
Source: PubMed Central journal article supplement (PMC6195192)
Supplement: NIHMS79212-supplement-Supplementary_tables.pdf [file NIHMS79212-supplement-Supplementary_tables.pdf]

**Supplementary Table 1.**

| <b>Period of diagnosis</b> | <b>Total</b> | <b>Type I epithelial<sup>b</sup></b> |             | <b>Type II epithelial<sup>c</sup></b> |             | <b>Germ cell</b> |            | <b>Sex cord-stromal</b> |            | <b>Other specific non-epithelial</b> |            | <b>Non-specific<sup>d</sup></b> |            |
|----------------------------|--------------|--------------------------------------|-------------|---------------------------------------|-------------|------------------|------------|-------------------------|------------|--------------------------------------|------------|---------------------------------|------------|
|                            | No.          | No.                                  | %           | No.                                   | %           | No.              | %          | No.                     | %          | No.                                  | %          | No.                             | %          |
| 1995-99                    | 192,080      | 45,770                               | <b>23.8</b> | 131,703                               | <b>68.6</b> | 3,693            | <b>1.9</b> | 3,380                   | <b>1.8</b> | 4,888                                | <b>2.5</b> | 2,646                           | <b>1.4</b> |
| 2000-04                    | 240,397      | 54,273                               | <b>22.6</b> | 167,508                               | <b>69.7</b> | 4,688            | <b>2.0</b> | 3,997                   | <b>1.7</b> | 6,182                                | <b>2.6</b> | 3,749                           | <b>1.6</b> |
| 2005-09                    | 249,282      | 52,831                               | <b>21.2</b> | 177,250                               | <b>71.1</b> | 4,928            | <b>2.0</b> | 4,067                   | <b>1.6</b> | 6,499                                | <b>2.6</b> | 3,707                           | <b>1.5</b> |
| <b>Total</b>               | 681,759      | 152,874                              | <b>22.4</b> | 476,461                               | <b>69.9</b> | 13,309           | <b>2.0</b> | 11,444                  | <b>1.7</b> | 17,569                               | <b>2.6</b> | 10,102                          | <b>1.5</b> |

**Supplementary Table 2.**

| Period of diagnosis | Total   | Type I epithelial |            |                           |             |          |            |          |            |                   |            | Type II epithelial  |             |                          |            |                                       |             |
|---------------------|---------|-------------------|------------|---------------------------|-------------|----------|------------|----------|------------|-------------------|------------|---------------------|-------------|--------------------------|------------|---------------------------------------|-------------|
|                     |         | Clear Cell        |            | Endometrioid <sup>b</sup> |             | Mucinous |            | Squamous |            | Transitional cell |            | Serous <sup>c</sup> |             | Mixed epithelial-stromal |            | Undifferentiated and other epithelial |             |
|                     |         | No.               | %          | No.                       | %           | No.      | %          | No.      | %          | No.               | %          | No.                 | %           | No.                      | %          | No.                                   | %           |
| 1995-99             | 192,080 | 7,063             | <b>3.7</b> | 19,238                    | <b>10.0</b> | 17,684   | <b>9.2</b> | 1,022    | <b>0.5</b> | 763               | <b>0.4</b> | 68,980              | <b>35.9</b> | 4,600                    | <b>2.4</b> | 58,123                                | <b>30.3</b> |
| 2000-04             | 240,397 | 9,705             | <b>4.0</b> | 23,512                    | <b>9.8</b>  | 18,797   | <b>7.8</b> | 1,227    | <b>0.5</b> | 1,032             | <b>0.4</b> | 94,318              | <b>39.2</b> | 7,170                    | <b>3.0</b> | 66,020                                | <b>27.5</b> |
| 2005-09             | 249,282 | 11,057            | <b>4.4</b> | 22,151                    | <b>8.9</b>  | 17,029   | <b>6.8</b> | 1,297    | <b>0.5</b> | 1,297             | <b>0.5</b> | 107,836             | <b>43.3</b> | 10,342                   | <b>4.1</b> | 59,072                                | <b>23.7</b> |

**Supplementary Table 3.**

| Period of diagnosis                | Total   | Type I epithelial |     |                           |      |          |      |          |     |                   |     | Type II epithelial  |      |                          |     |                                       |      |
|------------------------------------|---------|-------------------|-----|---------------------------|------|----------|------|----------|-----|-------------------|-----|---------------------|------|--------------------------|-----|---------------------------------------|------|
|                                    |         | Clear Cell        |     | Endometrioid <sup>b</sup> |      | Mucinous |      | Squamous |     | Transitional cell |     | Serous <sup>c</sup> |      | Mixed epithelial-stromal |     | Undifferentiated and other epithelial |      |
|                                    |         | No.               | %   | No.                       | %    | No.      | %    | No.      | %   | No.               | %   | No.                 | %    | No.                      | %   | No.                                   | %    |
| <b>AMERICA (CENTRAL AND SOUTH)</b> |         |                   |     |                           |      |          |      |          |     |                   |     |                     |      |                          |     |                                       |      |
| 1995-99                            | 1,113   | 15                | 1.3 | 106                       | 9.5  | 91       | 8.2  | 6        | 0.5 | 2                 | 0.2 | 275                 | 24.7 | 10                       | 0.9 | 435                                   | 39.1 |
| 2000-04                            | 3,278   | 55                | 1.7 | 185                       | 5.6  | 292      | 8.9  | 38       | 1.2 | 17                | 0.5 | 849                 | 25.9 | 23                       | 0.7 | 1,337                                 | 40.8 |
| 2005-09                            | 2,699   | 73                | 2.7 | 222                       | 8.2  | 236      | 8.7  | 28       | 1.0 | 11                | 0.4 | 815                 | 30.2 | 45                       | 1.7 | 912                                   | 33.8 |
| <b>AMERICA (NORTH)</b>             |         |                   |     |                           |      |          |      |          |     |                   |     |                     |      |                          |     |                                       |      |
| 1995-99                            | 87,459  | 3,416             | 3.9 | 9,673                     | 11.1 | 6,931    | 7.9  | 356      | 0.4 | 407               | 0.5 | 35,210              | 40.3 | 2,669                    | 3.1 | 22,554                                | 25.8 |
| 2000-04                            | 101,774 | 4,279             | 4.2 | 10,588                    | 10.4 | 6,204    | 6.1  | 452      | 0.4 | 484               | 0.5 | 44,428              | 43.7 | 4,295                    | 4.2 | 23,757                                | 23.3 |
| 2005-09                            | 106,898 | 4,632             | 4.3 | 9,590                     | 9.0  | 5,473    | 5.1  | 495      | 0.5 | 520               | 0.5 | 49,290              | 46.1 | 7,003                    | 6.6 | 21,782                                | 20.4 |
| <b>ASIA</b>                        |         |                   |     |                           |      |          |      |          |     |                   |     |                     |      |                          |     |                                       |      |
| 1995-99                            | 12,920  | 729               | 5.6 | 1,333                     | 10.3 | 1,998    | 15.5 | 185      | 1.4 | 79                | 0.6 | 4,054               | 31.4 | 157                      | 1.2 | 2,564                                 | 19.8 |
| 2000-04                            | 19,312  | 1,548             | 8.0 | 2,007                     | 10.4 | 2,654    | 13.7 | 224      | 1.2 | 155               | 0.8 | 6,567               | 34.0 | 305                      | 1.6 | 3,370                                 | 17.5 |
| 2005-09                            | 24,533  | 2,366             | 9.6 | 2,405                     | 9.8  | 2,666    | 10.9 | 259      | 1.1 | 283               | 1.2 | 9,080               | 37.0 | 543                      | 2.2 | 4,152                                 | 16.9 |
| <b>EUROPE</b>                      |         |                   |     |                           |      |          |      |          |     |                   |     |                     |      |                          |     |                                       |      |
| 1995-99                            | 84,056  | 2,588             | 3.1 | 7,579                     | 9.0  | 8,024    | 9.5  | 440      | 0.5 | 256               | 0.3 | 26,657              | 31.7 | 1,528                    | 1.8 | 31,044                                | 36.9 |
| 2000-04                            | 108,891 | 3,468             | 3.2 | 10,141                    | 9.3  | 9,176    | 8.4  | 487      | 0.4 | 353               | 0.3 | 39,142              | 35.9 | 2,208                    | 2.0 | 36,026                                | 33.1 |
| 2005-09                            | 108,766 | 3,650             | 3.4 | 9,469                     | 8.7  | 8,256    | 7.6  | 491      | 0.5 | 447               | 0.4 | 45,470              | 41.8 | 2,465                    | 2.3 | 31,022                                | 28.5 |
| <b>OCEANIA</b>                     |         |                   |     |                           |      |          |      |          |     |                   |     |                     |      |                          |     |                                       |      |
| 1995-99                            | 6,532   | 315               | 4.8 | 547                       | 8.4  | 640      | 9.8  | 35       | 0.5 | 19                | 0.3 | 2,784               | 42.6 | 236                      | 3.6 | 1,526                                 | 23.4 |
| 2000-04                            | 7,142   | 355               | 5.0 | 591                       | 8.3  | 471      | 6.6  | 26       | 0.4 | 23                | 0.3 | 3,332               | 46.7 | 339                      | 4.7 | 1,530                                 | 21.4 |
| 2005-09                            | 6,386   | 336               | 5.3 | 465                       | 7.3  | 398      | 6.2  | 24       | 0.4 | 36                | 0.6 | 3,181               | 49.8 | 286                      | 4.5 | 1,204                                 | 18.9 |

Supplementary Table 4.

| Period of diagnosis                | Total<br>No. | Type I epithelial <sup>b</sup> |             | Type II epithelial <sup>c</sup> |             | Germ cell |            | Sex cord-stromal |            | Other specific non-epithelial |             | Non-specific <sup>d</sup> |             |
|------------------------------------|--------------|--------------------------------|-------------|---------------------------------|-------------|-----------|------------|------------------|------------|-------------------------------|-------------|---------------------------|-------------|
|                                    |              | No.                            | %           | No.                             | %           | No.       | %          | No.              | %          | No.                           | %           | No.                       | %           |
| <b>AMERICA (CENTRAL AND SOUTH)</b> |              |                                |             |                                 |             |           |            |                  |            |                               |             |                           |             |
| <b>Argentinian registries</b>      |              |                                |             |                                 |             |           |            |                  |            |                               |             |                           |             |
| 1995-99                            | -            | -                              | .           | -                               | .           | -         | .          | -                | .          | -                             | .           | -                         | .           |
| 2000-04                            | 182          | 39                             | <b>21.4</b> | 117                             | <b>64.3</b> | 6         | <b>3.3</b> | 5                | <b>2.7</b> | 5                             | <b>2.7</b>  | 10                        | <b>5.5</b>  |
| 2005-09                            | 598          | 112                            | <b>18.7</b> | 403                             | <b>67.4</b> | 28        | <b>4.7</b> | 14               | <b>2.3</b> | 9                             | <b>1.5</b>  | 32                        | <b>5.4</b>  |
| <b>Brazilian registries</b>        |              |                                |             |                                 |             |           |            |                  |            |                               |             |                           |             |
| 1995-99                            | 168          | 49                             | <b>29.2</b> | 92                              | <b>54.8</b> | 3         | <b>1.8</b> | 3                | <b>1.8</b> | 20                            | <b>11.9</b> | 1                         | <b>0.6</b>  |
| 2000-04                            | 434          | 96                             | <b>22.1</b> | 281                             | <b>64.7</b> | 15        | <b>3.5</b> | 6                | <b>1.4</b> | 27                            | <b>6.2</b>  | 9                         | <b>2.1</b>  |
| 2005-09                            | 252          | 60                             | <b>23.8</b> | 160                             | <b>63.5</b> | 13        | <b>5.2</b> | 4                | <b>1.6</b> | 8                             | <b>3.2</b>  | 7                         | <b>2.8</b>  |
| <b>Colombia (Cali)</b>             |              |                                |             |                                 |             |           |            |                  |            |                               |             |                           |             |
| 1995-99                            | 302          | 78                             | <b>25.8</b> | 181                             | <b>59.9</b> | 12        | <b>4.0</b> | 8                | <b>2.6</b> | 12                            | <b>4.0</b>  | 11                        | <b>3.6</b>  |
| 2000-04                            | 337          | 86                             | <b>25.5</b> | 204                             | <b>60.5</b> | 19        | <b>5.6</b> | 7                | <b>2.1</b> | 10                            | <b>3.0</b>  | 11                        | <b>3.3</b>  |
| 2005-09                            | 335          | 81                             | <b>24.2</b> | 216                             | <b>64.5</b> | 13        | <b>3.9</b> | 13               | <b>3.9</b> | 4                             | <b>1.2</b>  | 8                         | <b>2.4</b>  |
| <b>Cuba*</b>                       |              |                                |             |                                 |             |           |            |                  |            |                               |             |                           |             |
| 1995-99                            | 455          | 71                             | <b>15.6</b> | 320                             | <b>70.3</b> | 22        | <b>4.8</b> | 10               | <b>2.2</b> | 19                            | <b>4.2</b>  | 13                        | <b>2.9</b>  |
| 2000-04                            | 1,464        | 187                            | <b>12.8</b> | 1,060                           | <b>72.4</b> | 42        | <b>2.9</b> | 50               | <b>3.4</b> | 55                            | <b>3.8</b>  | 70                        | <b>4.8</b>  |
| 2005-09                            | 560          | 130                            | <b>23.2</b> | 371                             | <b>66.3</b> | 9         | <b>1.6</b> | 25               | <b>4.5</b> | 19                            | <b>3.4</b>  | 6                         | <b>1.1</b>  |
| <b>Ecuador (Quito)</b>             |              |                                |             |                                 |             |           |            |                  |            |                               |             |                           |             |
| 1995-99                            | 188          | 22                             | <b>11.7</b> | 127                             | <b>67.6</b> | 13        | <b>6.9</b> | 9                | <b>4.8</b> | 10                            | <b>5.3</b>  | 7                         | <b>3.7</b>  |
| 2000-04                            | 209          | 32                             | <b>15.3</b> | 133                             | <b>63.6</b> | 15        | <b>7.2</b> | 9                | <b>4.3</b> | 13                            | <b>6.2</b>  | 7                         | <b>3.3</b>  |
| 2005-09                            | 270          | 43                             | <b>15.9</b> | 173                             | <b>64.1</b> | 21        | <b>7.8</b> | 7                | <b>2.6</b> | 16                            | <b>5.9</b>  | 10                        | <b>3.7</b>  |
| <b>Puerto Rico*</b>                |              |                                |             |                                 |             |           |            |                  |            |                               |             |                           |             |
| 1995-99                            | -            | -                              | .           | -                               | .           | -         | .          | -                | .          | -                             | .           | -                         | .           |
| 2000-04                            | 652          | 147                            | <b>22.5</b> | 414                             | <b>63.5</b> | 27        | <b>4.1</b> | 13               | <b>2.0</b> | 21                            | <b>3.2</b>  | 30                        | <b>4.6</b>  |
| 2005-09                            | 684          | 144                            | <b>21.1</b> | 449                             | <b>65.6</b> | 22        | <b>3.2</b> | 11               | <b>1.6</b> | 36                            | <b>5.3</b>  | 22                        | <b>3.2</b>  |
| <b>AMERICA (NORTH)</b>             |              |                                |             |                                 |             |           |            |                  |            |                               |             |                           |             |
| <b>Canada*</b>                     |              |                                |             |                                 |             |           |            |                  |            |                               |             |                           |             |
| 1995-99                            | 10,366       | 2,828                          | <b>27.3</b> | 6,859                           | <b>66.2</b> | 226       | <b>2.2</b> | 128              | <b>1.2</b> | 251                           | <b>2.4</b>  | 74                        | <b>0.7</b>  |
| 2000-04                            | 11,347       | 2,787                          | <b>24.6</b> | 7,906                           | <b>69.7</b> | 209       | <b>1.8</b> | 114              | <b>1.0</b> | 247                           | <b>2.2</b>  | 84                        | <b>0.7</b>  |
| 2005-09                            | 12,196       | 2,676                          | <b>21.9</b> | 8,762                           | <b>71.8</b> | 258       | <b>2.1</b> | 133              | <b>1.1</b> | 276                           | <b>2.3</b>  | 91                        | <b>0.7</b>  |
| <b>US registries</b>               |              |                                |             |                                 |             |           |            |                  |            |                               |             |                           |             |
| 1995-99                            | 77,093       | 17,955                         | <b>23.3</b> | 53,574                          | <b>69.5</b> | 1,365     | <b>1.8</b> | 1,232            | <b>1.6</b> | 2,162                         | <b>2.8</b>  | 805                       | <b>1.0</b>  |
| 2000-04                            | 90,427       | 19,220                         | <b>21.3</b> | 64,574                          | <b>71.4</b> | 1,698     | <b>1.9</b> | 1,340            | <b>1.5</b> | 2,487                         | <b>2.8</b>  | 1,108                     | <b>1.2</b>  |
| 2005-09                            | 94,702       | 18,034                         | <b>19.0</b> | 69,313                          | <b>73.2</b> | 1,909     | <b>2.0</b> | 1,523            | <b>1.6</b> | 2,803                         | <b>3.0</b>  | 1,120                     | <b>1.2</b>  |
| <b>ASIA</b>                        |              |                                |             |                                 |             |           |            |                  |            |                               |             |                           |             |
| <b>Chinese registries</b>          |              |                                |             |                                 |             |           |            |                  |            |                               |             |                           |             |
| 1995-99                            | 131          | 31                             | <b>23.7</b> | 76                              | <b>58.0</b> | 4         | <b>3.1</b> | 2                | <b>1.5</b> | 2                             | <b>1.5</b>  | 16                        | <b>12.2</b> |
| 2000-04                            | 1,139        | 246                            | <b>21.6</b> | 669                             | <b>58.7</b> | 49        | <b>4.3</b> | 27               | <b>2.4</b> | 33                            | <b>2.9</b>  | 115                       | <b>10.1</b> |
| 2005-09                            | 3,150        | 687                            | <b>21.8</b> | 2,031                           | <b>64.5</b> | 116       | <b>3.7</b> | 64               | <b>2.0</b> | 93                            | <b>3.0</b>  | 159                       | <b>5.0</b>  |

|                            |       |       |             |       |             |     |            |     |            |     |            |     |             |
|----------------------------|-------|-------|-------------|-------|-------------|-----|------------|-----|------------|-----|------------|-----|-------------|
| <b>Cyprus*</b>             |       |       |             |       |             |     |            |     |            |     |            |     |             |
| 1995-99                    | -     | -     | .           | -     | .           | -   | .          | -   | .          | -   | .          | -   | .           |
| 2000-04                    | -     | -     | .           | -     | .           | -   | .          | -   | .          | -   | .          | -   | .           |
| 2005-09                    | 225   | 42    | <b>18.7</b> | 163   | <b>72.4</b> | 2   | <b>0.9</b> | 3   | <b>1.3</b> | 13  | <b>5.8</b> | 2   | <b>0.9</b>  |
| <b>Hong Kong*</b>          |       |       |             |       |             |     |            |     |            |     |            |     |             |
| 1995-99                    | 527   | 280   | <b>53.1</b> | 247   | <b>46.9</b> | -   | .          | -   | .          | -   | .          | -   | .           |
| 2000-04                    | 1,012 | 522   | <b>51.6</b> | 490   | <b>48.4</b> | -   | .          | -   | .          | -   | .          | -   | .           |
| 2005-09                    | 437   | 226   | <b>51.7</b> | 211   | <b>48.3</b> | -   | .          | -   | .          | -   | .          | -   | .           |
| <b>Indian registries</b>   |       |       |             |       |             |     |            |     |            |     |            |     |             |
| 1995-99                    | 391   | 46    | <b>11.8</b> | 252   | <b>64.5</b> | 27  | <b>6.9</b> | 13  | <b>3.3</b> | 1   | <b>0.3</b> | 52  | <b>13.3</b> |
| 2000-04                    | -     | -     | .           | -     | .           | -   | .          | -   | .          | -   | .          | -   | .           |
| 2005-09                    | -     | -     | .           | -     | .           | -   | .          | -   | .          | -   | .          | -   | .           |
| <b>Indonesia (Jakarta)</b> |       |       |             |       |             |     |            |     |            |     |            |     |             |
| 1995-99                    | -     | -     | .           | -     | .           | -   | .          | -   | .          | -   | .          | -   | .           |
| 2000-04                    | -     | -     | .           | -     | .           | -   | .          | -   | .          | -   | .          | -   | .           |
| 2005-09                    | 182   | 73    | <b>40.1</b> | 86    | <b>47.3</b> | 14  | <b>7.7</b> | 7   | <b>3.8</b> | 1   | <b>0.5</b> | 1   | <b>0.5</b>  |
| <b>Israel*</b>             |       |       |             |       |             |     |            |     |            |     |            |     |             |
| 1995-99                    | 1,690 | 336   | <b>19.9</b> | 1,195 | <b>70.7</b> | 34  | <b>2.0</b> | 15  | <b>0.9</b> | 53  | <b>3.1</b> | 57  | <b>3.4</b>  |
| 2000-04                    | 1,921 | 309   | <b>16.1</b> | 1,407 | <b>73.2</b> | 57  | <b>3.0</b> | 9   | <b>0.5</b> | 78  | <b>4.1</b> | 61  | <b>3.2</b>  |
| 2005-09                    | 1,957 | 251   | <b>12.8</b> | 1,522 | <b>77.8</b> | 40  | <b>2.0</b> | 11  | <b>0.6</b> | 71  | <b>3.6</b> | 62  | <b>3.2</b>  |
| <b>Japanese registries</b> |       |       |             |       |             |     |            |     |            |     |            |     |             |
| 1995-99                    | 1,790 | 537   | <b>30.0</b> | 958   | <b>53.5</b> | 58  | <b>3.2</b> | 16  | <b>0.9</b> | 72  | <b>4.0</b> | 149 | <b>8.3</b>  |
| 2000-04                    | 3,124 | 1,176 | <b>37.6</b> | 1,573 | <b>50.4</b> | 93  | <b>3.0</b> | 21  | <b>0.7</b> | 126 | <b>4.0</b> | 135 | <b>4.3</b>  |
| 2005-09                    | 3,647 | 1,508 | <b>41.3</b> | 1,732 | <b>47.5</b> | 129 | <b>3.5</b> | 26  | <b>0.7</b> | 119 | <b>3.3</b> | 133 | <b>3.6</b>  |
| <b>Jordan*</b>             |       |       |             |       |             |     |            |     |            |     |            |     |             |
| 1995-99                    | -     | -     | .           | -     | .           | -   | .          | -   | .          | -   | .          | -   | .           |
| 2000-04                    | 305   | 61    | <b>20.0</b> | 196   | <b>64.3</b> | 22  | <b>7.2</b> | 11  | <b>3.6</b> | 8   | <b>2.6</b> | 7   | <b>2.3</b>  |
| 2005-09                    | 382   | 58    | <b>15.2</b> | 246   | <b>64.4</b> | 31  | <b>8.1</b> | 18  | <b>4.7</b> | 19  | <b>5.0</b> | 10  | <b>2.6</b>  |
| <b>Korea*</b>              |       |       |             |       |             |     |            |     |            |     |            |     |             |
| 1995-99                    | 4,526 | 1,648 | <b>36.4</b> | 2,274 | <b>50.2</b> | 356 | <b>7.9</b> | 123 | <b>2.7</b> | 29  | <b>0.6</b> | 96  | <b>2.1</b>  |
| 2000-04                    | 6,036 | 2,132 | <b>35.3</b> | 3,162 | <b>52.4</b> | 382 | <b>6.3</b> | 215 | <b>3.6</b> | 42  | <b>0.7</b> | 103 | <b>1.7</b>  |
| 2005-09                    | 7,859 | 2,512 | <b>32.0</b> | 4,550 | <b>57.9</b> | 392 | <b>5.0</b> | 207 | <b>2.6</b> | 64  | <b>0.8</b> | 134 | <b>1.7</b>  |
| <b>Malaysia (Penang)</b>   |       |       |             |       |             |     |            |     |            |     |            |     |             |
| 1995-99                    | 144   | 52    | <b>36.1</b> | 75    | <b>52.1</b> | 11  | <b>7.6</b> | 4   | <b>2.8</b> | -   | .          | 2   | <b>1.4</b>  |
| 2000-04                    | 220   | 93    | <b>42.3</b> | 104   | <b>47.3</b> | 11  | <b>5.0</b> | 8   | <b>3.6</b> | 2   | <b>0.9</b> | 2   | <b>0.9</b>  |
| 2005-09                    | 281   | 93    | <b>33.1</b> | 164   | <b>58.4</b> | 14  | <b>5.0</b> | 7   | <b>2.5</b> | 2   | <b>0.7</b> | 1   | <b>0.4</b>  |
| <b>Saudi Arabia*</b>       |       |       |             |       |             |     |            |     |            |     |            |     |             |
| 1995-99                    | 392   | 95    | <b>24.2</b> | 234   | <b>59.7</b> | 36  | <b>9.2</b> | 14  | <b>3.6</b> | 5   | <b>1.3</b> | 8   | <b>2.0</b>  |
| 2000-04                    | 552   | 118   | <b>21.4</b> | 335   | <b>60.7</b> | 54  | <b>9.8</b> | 19  | <b>3.4</b> | 19  | <b>3.4</b> | 7   | <b>1.3</b>  |
| 2005-09                    | -     | -     | .           | -     | .           | -   | .          | -   | .          | -   | .          | -   | .           |
| <b>Taiwan*</b>             |       |       |             |       |             |     |            |     |            |     |            |     |             |
| 1995-99                    | 2,768 | 1,098 | <b>39.7</b> | 1,177 | <b>42.5</b> | 215 | <b>7.8</b> | 65  | <b>2.3</b> | 183 | <b>6.6</b> | 30  | <b>1.1</b>  |
| 2000-04                    | 3,998 | 1,568 | <b>39.2</b> | 1,783 | <b>44.6</b> | 226 | <b>5.7</b> | 93  | <b>2.3</b> | 277 | <b>6.9</b> | 51  | <b>1.3</b>  |
| 2005-09                    | 5,165 | 2,112 | <b>40.9</b> | 2,400 | <b>46.5</b> | 248 | <b>4.8</b> | 126 | <b>2.4</b> | 252 | <b>4.9</b> | 27  | <b>0.5</b>  |

|                          |       |       |             |       |             |    |            |     |            |     |            |     |             |
|--------------------------|-------|-------|-------------|-------|-------------|----|------------|-----|------------|-----|------------|-----|-------------|
| <b>Thai registries</b>   |       |       |             |       |             |    |            |     |            |     |            |     |             |
| 1995-99                  | 171   | 76    | <b>44.4</b> | 70    | <b>40.9</b> | 16 | <b>9.4</b> | 6   | <b>3.5</b> | 2   | <b>1.2</b> | 1   | <b>0.6</b>  |
| 2000-04                  | 478   | 218   | <b>45.6</b> | 200   | <b>41.8</b> | 30 | <b>6.3</b> | 9   | <b>1.9</b> | 10  | <b>2.1</b> | 11  | <b>2.3</b>  |
| 2005-09                  | 549   | 252   | <b>45.9</b> | 222   | <b>40.4</b> | 30 | <b>5.5</b> | 23  | <b>4.2</b> | 10  | <b>1.8</b> | 12  | <b>2.2</b>  |
| <b>Turkey (Izmir)</b>    |       |       |             |       |             |    |            |     |            |     |            |     |             |
| 1995-99                  | 390   | 125   | <b>32.1</b> | 217   | <b>55.6</b> | 13 | <b>3.3</b> | 10  | <b>2.6</b> | 14  | <b>3.6</b> | 11  | <b>2.8</b>  |
| 2000-04                  | 527   | 145   | <b>27.5</b> | 323   | <b>61.3</b> | 16 | <b>3.0</b> | 10  | <b>1.9</b> | 14  | <b>2.7</b> | 19  | <b>3.6</b>  |
| 2005-09                  | 699   | 165   | <b>23.6</b> | 448   | <b>64.1</b> | 26 | <b>3.7</b> | 5   | <b>0.7</b> | 23  | <b>3.3</b> | 32  | <b>4.6</b>  |
| <b>EUROPE</b>            |       |       |             |       |             |    |            |     |            |     |            |     |             |
| <b>Austria*</b>          |       |       |             |       |             |    |            |     |            |     |            |     |             |
| 1995-99                  | 4,331 | 674   | <b>15.6</b> | 3,287 | <b>75.9</b> | 95 | <b>2.2</b> | 63  | <b>1.5</b> | 83  | <b>1.9</b> | 129 | <b>3.0</b>  |
| 2000-04                  | 4,180 | 603   | <b>14.4</b> | 3,168 | <b>75.8</b> | 45 | <b>1.1</b> | 67  | <b>1.6</b> | 86  | <b>2.1</b> | 211 | <b>5.0</b>  |
| 2005-09                  | 3,653 | 552   | <b>15.1</b> | 2,744 | <b>75.1</b> | 47 | <b>1.3</b> | 64  | <b>1.8</b> | 93  | <b>2.5</b> | 153 | <b>4.2</b>  |
| <b>Belgium*</b>          |       |       |             |       |             |    |            |     |            |     |            |     |             |
| 1995-99                  | -     | -     | .           | -     | .           | -  | .          | -   | .          | -   | .          | -   | .           |
| 2000-04                  | 948   | 228   | <b>24.1</b> | 653   | <b>68.9</b> | 16 | <b>1.7</b> | 14  | <b>1.5</b> | 25  | <b>2.6</b> | 12  | <b>1.3</b>  |
| 2005-09                  | 4,720 | 980   | <b>20.8</b> | 3,444 | <b>73.0</b> | 60 | <b>1.3</b> | 39  | <b>0.8</b> | 153 | <b>3.2</b> | 44  | <b>0.9</b>  |
| <b>Bulgaria*</b>         |       |       |             |       |             |    |            |     |            |     |            |     |             |
| 1995-99                  | 2,792 | 448   | <b>16.0</b> | 2,045 | <b>73.2</b> | 34 | <b>1.2</b> | 155 | <b>5.6</b> | 73  | <b>2.6</b> | 37  | <b>1.3</b>  |
| 2000-04                  | 3,368 | 691   | <b>20.5</b> | 2,323 | <b>69.0</b> | 45 | <b>1.3</b> | 142 | <b>4.2</b> | 104 | <b>3.1</b> | 63  | <b>1.9</b>  |
| 2005-09                  | 3,933 | 785   | <b>20.0</b> | 2,750 | <b>69.9</b> | 44 | <b>1.1</b> | 166 | <b>4.2</b> | 133 | <b>3.4</b> | 55  | <b>1.4</b>  |
| <b>Croatia*</b>          |       |       |             |       |             |    |            |     |            |     |            |     |             |
| 1995-99                  | 771   | 138   | <b>17.9</b> | 597   | <b>77.4</b> | 12 | <b>1.6</b> | 5   | <b>0.6</b> | 12  | <b>1.6</b> | 7   | <b>0.9</b>  |
| 2000-04                  | 1,998 | 428   | <b>21.4</b> | 1,491 | <b>74.6</b> | 20 | <b>1.0</b> | 31  | <b>1.6</b> | 20  | <b>1.0</b> | 8   | <b>0.4</b>  |
| 2005-09                  | 1,930 | 428   | <b>22.2</b> | 1,422 | <b>73.7</b> | 29 | <b>1.5</b> | 28  | <b>1.5</b> | 12  | <b>0.6</b> | 11  | <b>0.6</b>  |
| <b>Czech Republic*</b>   |       |       |             |       |             |    |            |     |            |     |            |     |             |
| 1995-99                  | 5,223 | 1,339 | <b>25.6</b> | 3,330 | <b>63.8</b> | 76 | <b>1.5</b> | 209 | <b>4.0</b> | 131 | <b>2.5</b> | 138 | <b>2.6</b>  |
| 2000-04                  | 5,502 | 1,366 | <b>24.8</b> | 3,565 | <b>64.8</b> | 81 | <b>1.5</b> | 172 | <b>3.1</b> | 160 | <b>2.9</b> | 158 | <b>2.9</b>  |
| 2005-09                  | 5,220 | 1,090 | <b>20.9</b> | 3,632 | <b>69.6</b> | 55 | <b>1.1</b> | 140 | <b>2.7</b> | 143 | <b>2.7</b> | 160 | <b>3.1</b>  |
| <b>Denmark*</b>          |       |       |             |       |             |    |            |     |            |     |            |     |             |
| 1995-99                  | 3,068 | 796   | <b>25.9</b> | 2,080 | <b>67.8</b> | 44 | <b>1.4</b> | 47  | <b>1.5</b> | 78  | <b>2.5</b> | 23  | <b>0.7</b>  |
| 2000-04                  | 2,991 | 750   | <b>25.1</b> | 2,050 | <b>68.5</b> | 54 | <b>1.8</b> | 41  | <b>1.4</b> | 58  | <b>1.9</b> | 38  | <b>1.3</b>  |
| 2005-09                  | 2,997 | 633   | <b>21.1</b> | 2,161 | <b>72.1</b> | 27 | <b>0.9</b> | 8   | <b>0.3</b> | 74  | <b>2.5</b> | 94  | <b>3.1</b>  |
| <b>Estonia*</b>          |       |       |             |       |             |    |            |     |            |     |            |     |             |
| 1995-99                  | 792   | 133   | <b>16.8</b> | 511   | <b>64.5</b> | 5  | <b>0.6</b> | 47  | <b>5.9</b> | 16  | <b>2.0</b> | 80  | <b>10.1</b> |
| 2000-04                  | 710   | 116   | <b>16.3</b> | 495   | <b>69.7</b> | 10 | <b>1.4</b> | 19  | <b>2.7</b> | 18  | <b>2.5</b> | 52  | <b>7.3</b>  |
| 2005-09                  | 613   | 95    | <b>15.5</b> | 432   | <b>70.5</b> | 10 | <b>1.6</b> | 21  | <b>3.4</b> | 23  | <b>3.8</b> | 32  | <b>5.2</b>  |
| <b>Finland*</b>          |       |       |             |       |             |    |            |     |            |     |            |     |             |
| 1995-99                  | 2,325 | 901   | <b>38.8</b> | 1,266 | <b>54.5</b> | 21 | <b>0.9</b> | 26  | <b>1.1</b> | 28  | <b>1.2</b> | 83  | <b>3.6</b>  |
| 2000-04                  | 2,512 | 895   | <b>35.6</b> | 1,431 | <b>57.0</b> | 41 | <b>1.6</b> | 21  | <b>0.8</b> | 20  | <b>0.8</b> | 104 | <b>4.1</b>  |
| 2005-09                  | 2,485 | 712   | <b>28.7</b> | 1,561 | <b>62.8</b> | 30 | <b>1.2</b> | 11  | <b>0.4</b> | 53  | <b>2.1</b> | 118 | <b>4.7</b>  |
| <b>French registries</b> |       |       |             |       |             |    |            |     |            |     |            |     |             |
| 1995-99                  | 2,495 | 580   | <b>23.2</b> | 1,724 | <b>69.1</b> | 51 | <b>2.0</b> | 28  | <b>1.1</b> | 87  | <b>3.5</b> | 25  | <b>1.0</b>  |
| 2000-04                  | 2,870 | 621   | <b>21.6</b> | 2,035 | <b>70.9</b> | 56 | <b>2.0</b> | 27  | <b>0.9</b> | 98  | <b>3.4</b> | 33  | <b>1.1</b>  |
| 2005-09                  | 242   | 62    | <b>25.6</b> | 163   | <b>67.4</b> | 7  | <b>2.9</b> | -   | .          | 9   | <b>3.7</b> | 1   | <b>0.4</b>  |

|                           |        |       |             |        |             |     |            |     |            |     |            |     |            |
|---------------------------|--------|-------|-------------|--------|-------------|-----|------------|-----|------------|-----|------------|-----|------------|
| <b>German registries</b>  |        |       |             |        |             |     |            |     |            |     |            |     |            |
| 1995-99                   | 5,295  | 912   | <b>17.2</b> | 4,003  | <b>75.6</b> | 50  | <b>0.9</b> | 118 | <b>2.2</b> | 110 | <b>2.1</b> | 102 | <b>1.9</b> |
| 2000-04                   | 9,047  | 1,574 | <b>17.4</b> | 6,921  | <b>76.5</b> | 95  | <b>1.1</b> | 160 | <b>1.8</b> | 172 | <b>1.9</b> | 125 | <b>1.4</b> |
| 2005-09                   | 10,566 | 1,809 | <b>17.1</b> | 8,223  | <b>77.8</b> | 110 | <b>1.0</b> | 114 | <b>1.1</b> | 207 | <b>2.0</b> | 103 | <b>1.0</b> |
| <b>Iceland*</b>           |        |       |             |        |             |     |            |     |            |     |            |     |            |
| 1995-99                   | 113    | 21    | <b>18.6</b> | 86     | <b>76.1</b> | 3   | <b>2.7</b> | 2   | <b>1.8</b> | 1   | <b>0.9</b> | -   | .          |
| 2000-04                   | 127    | 24    | <b>18.9</b> | 94     | <b>74.0</b> | 2   | <b>1.6</b> | 1   | <b>0.8</b> | 6   | <b>4.7</b> | -   | .          |
| 2005-09                   | 118    | 20    | <b>16.9</b> | 90     | <b>76.3</b> | 1   | <b>0.8</b> | -   | .          | 7   | <b>5.9</b> | -   | .          |
| <b>Ireland*</b>           |        |       |             |        |             |     |            |     |            |     |            |     |            |
| 1995-99                   | 1,332  | 323   | <b>24.2</b> | 948    | <b>71.2</b> | 21  | <b>1.6</b> | 10  | <b>0.8</b> | 15  | <b>1.1</b> | 15  | <b>1.1</b> |
| 2000-04                   | 1,477  | 375   | <b>25.4</b> | 1,043  | <b>70.6</b> | 19  | <b>1.3</b> | 9   | <b>0.6</b> | 15  | <b>1.0</b> | 16  | <b>1.1</b> |
| 2005-09                   | 1,607  | 382   | <b>23.8</b> | 1,146  | <b>71.3</b> | 23  | <b>1.4</b> | 20  | <b>1.2</b> | 24  | <b>1.5</b> | 12  | <b>0.7</b> |
| <b>Italian registries</b> |        |       |             |        |             |     |            |     |            |     |            |     |            |
| 1995-99                   | 6,772  | 1,384 | <b>20.4</b> | 4,711  | <b>69.6</b> | 85  | <b>1.3</b> | 83  | <b>1.2</b> | 298 | <b>4.4</b> | 211 | <b>3.1</b> |
| 2000-04                   | 8,394  | 1,724 | <b>20.5</b> | 5,811  | <b>69.2</b> | 89  | <b>1.1</b> | 78  | <b>0.9</b> | 383 | <b>4.6</b> | 309 | <b>3.7</b> |
| 2005-09                   | 5,087  | 1,104 | <b>21.7</b> | 3,448  | <b>67.8</b> | 60  | <b>1.2</b> | 47  | <b>0.9</b> | 234 | <b>4.6</b> | 194 | <b>3.8</b> |
| <b>Latvia*</b>            |        |       |             |        |             |     |            |     |            |     |            |     |            |
| 1995-99                   | 1,219  | 71    | <b>5.8</b>  | 1,064  | <b>87.3</b> | 23  | <b>1.9</b> | 33  | <b>2.7</b> | 28  | <b>2.3</b> | -   | .          |
| 2000-04                   | 1,205  | 104   | <b>8.6</b>  | 1,013  | <b>84.1</b> | 13  | <b>1.1</b> | 46  | <b>3.8</b> | 20  | <b>1.7</b> | 9   | <b>0.7</b> |
| 2005-09                   | 1,233  | 139   | <b>11.3</b> | 973    | <b>78.9</b> | 9   | <b>0.7</b> | 75  | <b>6.1</b> | 27  | <b>2.2</b> | 10  | <b>0.8</b> |
| <b>Lithuania*</b>         |        |       |             |        |             |     |            |     |            |     |            |     |            |
| 1995-99                   | 1,630  | 116   | <b>7.1</b>  | 1,367  | <b>83.9</b> | 21  | <b>1.3</b> | 58  | <b>3.6</b> | 31  | <b>1.9</b> | 37  | <b>2.3</b> |
| 2000-04                   | 1,781  | 203   | <b>11.4</b> | 1,428  | <b>80.2</b> | 17  | <b>1.0</b> | 44  | <b>2.5</b> | 63  | <b>3.5</b> | 26  | <b>1.5</b> |
| 2005-09                   | 1,780  | 295   | <b>16.6</b> | 1,346  | <b>75.6</b> | 23  | <b>1.3</b> | 47  | <b>2.6</b> | 53  | <b>3.0</b> | 16  | <b>0.9</b> |
| <b>Malta*</b>             |        |       |             |        |             |     |            |     |            |     |            |     |            |
| 1995-99                   | 149    | 50    | <b>33.6</b> | 85     | <b>57.0</b> | 5   | <b>3.4</b> | 3   | <b>2.0</b> | 5   | <b>3.4</b> | 1   | <b>0.7</b> |
| 2000-04                   | 197    | 60    | <b>30.5</b> | 113    | <b>57.4</b> | 4   | <b>2.0</b> | 3   | <b>1.5</b> | 3   | <b>1.5</b> | 14  | <b>7.1</b> |
| 2005-09                   | 191    | 47    | <b>24.6</b> | 120    | <b>62.8</b> | 4   | <b>2.1</b> | 1   | <b>0.5</b> | 7   | <b>3.7</b> | 12  | <b>6.3</b> |
| <b>Netherlands*</b>       |        |       |             |        |             |     |            |     |            |     |            |     |            |
| 1995-99                   | 6,624  | 1,714 | <b>25.9</b> | 4,484  | <b>67.7</b> | 88  | <b>1.3</b> | 173 | <b>2.6</b> | 157 | <b>2.4</b> | 8   | <b>0.1</b> |
| 2000-04                   | 6,289  | 1,508 | <b>24.0</b> | 4,385  | <b>69.7</b> | 109 | <b>1.7</b> | 101 | <b>1.6</b> | 177 | <b>2.8</b> | 9   | <b>0.1</b> |
| 2005-09                   | 6,403  | 1,437 | <b>22.4</b> | 4,631  | <b>72.3</b> | 95  | <b>1.5</b> | 82  | <b>1.3</b> | 150 | <b>2.3</b> | 8   | <b>0.1</b> |
| <b>Norway*</b>            |        |       |             |        |             |     |            |     |            |     |            |     |            |
| 1995-99                   | 2,358  | 534   | <b>22.6</b> | 1,639  | <b>69.5</b> | 37  | <b>1.6</b> | 61  | <b>2.6</b> | 69  | <b>2.9</b> | 18  | <b>0.8</b> |
| 2000-04                   | 2,506  | 534   | <b>21.3</b> | 1,783  | <b>71.1</b> | 52  | <b>2.1</b> | 26  | <b>1.0</b> | 82  | <b>3.3</b> | 29  | <b>1.2</b> |
| 2005-09                   | 2,416  | 385   | <b>15.9</b> | 1,848  | <b>76.5</b> | 44  | <b>1.8</b> | 29  | <b>1.2</b> | 73  | <b>3.0</b> | 37  | <b>1.5</b> |
| <b>Poland*</b>            |        |       |             |        |             |     |            |     |            |     |            |     |            |
| 1995-99                   | 3,158  | 683   | <b>21.6</b> | 2,177  | <b>68.9</b> | 64  | <b>2.0</b> | 136 | <b>4.3</b> | 34  | <b>1.1</b> | 64  | <b>2.0</b> |
| 2000-04                   | 13,114 | 3,017 | <b>23.0</b> | 8,945  | <b>68.2</b> | 237 | <b>1.8</b> | 474 | <b>3.6</b> | 188 | <b>1.4</b> | 253 | <b>1.9</b> |
| 2005-09                   | 14,837 | 3,455 | <b>23.3</b> | 10,206 | <b>68.8</b> | 251 | <b>1.7</b> | 463 | <b>3.1</b> | 191 | <b>1.3</b> | 271 | <b>1.8</b> |
| <b>Portugal*</b>          |        |       |             |        |             |     |            |     |            |     |            |     |            |
| 1995-99                   | 574    | 120   | <b>20.9</b> | 392    | <b>68.3</b> | 23  | <b>4.0</b> | 11  | <b>1.9</b> | 28  | <b>4.9</b> | -   | .          |
| 2000-04                   | 2,153  | 454   | <b>21.1</b> | 1,497  | <b>69.5</b> | 46  | <b>2.1</b> | 32  | <b>1.5</b> | 99  | <b>4.6</b> | 25  | <b>1.2</b> |
| 2005-09                   | 1,978  | 419   | <b>21.2</b> | 1,388  | <b>70.2</b> | 33  | <b>1.7</b> | 21  | <b>1.1</b> | 97  | <b>4.9</b> | 20  | <b>1.0</b> |

|                              |        |       |             |        |             |     |            |     |             |     |            |     |             |
|------------------------------|--------|-------|-------------|--------|-------------|-----|------------|-----|-------------|-----|------------|-----|-------------|
| <b>Romania (Cluj)</b>        |        |       |             |        |             |     |            |     |             |     |            |     |             |
| 1995-99                      | -      | -     | .           | -      | .           | -   | .          | -   | .           | -   | .          | -   |             |
| 2000-04                      | -      | -     | .           | -      | .           | -   | .          | -   | .           | -   | .          | -   |             |
| 2005-09                      | 196    | 47    | <b>24.0</b> | 129    | <b>65.8</b> | 2   | <b>1.0</b> | 4   | <b>2.0</b>  | 6   | <b>3.1</b> | 8   | <b>4.1</b>  |
| <b>Russia (Arkhangelsk)</b>  |        |       |             |        |             |     |            |     |             |     |            |     |             |
| 1995-99                      | -      | -     | .           | -      | .           | -   | .          | -   | .           | -   | .          | -   |             |
| 2000-04                      | 440    | 76    | <b>17.3</b> | 255    | <b>58.0</b> | 9   | <b>2.0</b> | 61  | <b>13.9</b> | 3   | <b>0.7</b> | 36  | <b>8.2</b>  |
| 2005-09                      | 402    | 76    | <b>18.9</b> | 202    | <b>50.2</b> | 7   | <b>1.7</b> | 46  | <b>11.4</b> | -   | .          | 71  | <b>17.7</b> |
| <b>Slovakia*</b>             |        |       |             |        |             |     |            |     |             |     |            |     |             |
| 1995-99                      | -      | -     | .           | -      | .           | -   | .          | -   | .           | -   | .          | -   |             |
| 2000-04                      | 1,983  | 555   | <b>28.0</b> | 1,243  | <b>62.7</b> | 41  | <b>2.1</b> | 63  | <b>3.2</b>  | 56  | <b>2.8</b> | 25  | <b>1.3</b>  |
| 2005-09                      | 1,339  | 351   | <b>26.2</b> | 868    | <b>64.8</b> | 29  | <b>2.2</b> | 37  | <b>2.8</b>  | 44  | <b>3.3</b> | 10  | <b>0.7</b>  |
| <b>Slovenia*</b>             |        |       |             |        |             |     |            |     |             |     |            |     |             |
| 1995-99                      | 824    | 194   | <b>23.5</b> | 567    | <b>68.8</b> | 15  | <b>1.8</b> | 11  | <b>1.3</b>  | 33  | <b>4.0</b> | 4   | <b>0.5</b>  |
| 2000-04                      | 911    | 236   | <b>25.9</b> | 604    | <b>66.3</b> | 18  | <b>2.0</b> | 8   | <b>0.9</b>  | 39  | <b>4.3</b> | 6   | <b>0.7</b>  |
| 2005-09                      | 986    | 256   | <b>26.0</b> | 677    | <b>68.7</b> | 8   | <b>0.8</b> | 7   | <b>0.7</b>  | 37  | <b>3.8</b> | 1   | <b>0.1</b>  |
| <b>Spanish registries</b>    |        |       |             |        |             |     |            |     |             |     |            |     |             |
| 1995-99                      | 2,728  | 890   | <b>32.6</b> | 1,591  | <b>58.3</b> | 51  | <b>1.9</b> | 25  | <b>0.9</b>  | 138 | <b>5.1</b> | 33  | <b>1.2</b>  |
| 2000-04                      | 2,862  | 827   | <b>28.9</b> | 1,784  | <b>62.3</b> | 64  | <b>2.2</b> | 21  | <b>0.7</b>  | 136 | <b>4.8</b> | 30  | <b>1.0</b>  |
| 2005-09                      | 2,553  | 674   | <b>26.4</b> | 1,675  | <b>65.6</b> | 49  | <b>1.9</b> | 19  | <b>0.7</b>  | 114 | <b>4.5</b> | 22  | <b>0.9</b>  |
| <b>Swiss registries</b>      |        |       |             |        |             |     |            |     |             |     |            |     |             |
| 1995-99                      | 1,413  | 325   | <b>23.0</b> | 1,002  | <b>70.9</b> | 19  | <b>1.3</b> | 18  | <b>1.3</b>  | 45  | <b>3.2</b> | 4   | <b>0.3</b>  |
| 2000-04                      | 1,376  | 285   | <b>20.7</b> | 1,013  | <b>73.6</b> | 24  | <b>1.7</b> | 14  | <b>1.0</b>  | 35  | <b>2.5</b> | 5   | <b>0.4</b>  |
| 2005-09                      | 1,581  | 297   | <b>18.8</b> | 1,172  | <b>74.1</b> | 19  | <b>1.2</b> | 7   | <b>0.4</b>  | 82  | <b>5.2</b> | 4   | <b>0.3</b>  |
| <b>United Kingdom*</b>       |        |       |             |        |             |     |            |     |             |     |            |     |             |
| 1995-99                      | 28,070 | 6,541 | <b>23.3</b> | 20,273 | <b>72.2</b> | 306 | <b>1.1</b> | 311 | <b>1.1</b>  | 397 | <b>1.4</b> | 242 | <b>0.9</b>  |
| 2000-04                      | 29,950 | 6,371 | <b>21.3</b> | 22,233 | <b>74.2</b> | 330 | <b>1.1</b> | 290 | <b>1.0</b>  | 460 | <b>1.5</b> | 266 | <b>0.9</b>  |
| 2005-09                      | 29,700 | 5,783 | <b>19.5</b> | 22,506 | <b>75.8</b> | 377 | <b>1.3</b> | 288 | <b>1.0</b>  | 445 | <b>1.5</b> | 301 | <b>1.0</b>  |
| <b>OCEANIA</b>               |        |       |             |        |             |     |            |     |             |     |            |     |             |
| <b>Australian registries</b> |        |       |             |        |             |     |            |     |             |     |            |     |             |
| 1995-99                      | 5,281  | 1,203 | <b>22.8</b> | 3,757  | <b>71.1</b> | 102 | <b>1.9</b> | 71  | <b>1.3</b>  | 130 | <b>2.5</b> | 18  | <b>0.3</b>  |
| 2000-04                      | 5,895  | 1,161 | <b>19.7</b> | 4,363  | <b>74.0</b> | 145 | <b>2.5</b> | 47  | <b>0.8</b>  | 144 | <b>2.4</b> | 35  | <b>0.6</b>  |
| 2005-09                      | 4,954  | 971   | <b>19.6</b> | 3,644  | <b>73.6</b> | 120 | <b>2.4</b> | 45  | <b>0.9</b>  | 132 | <b>2.7</b> | 42  | <b>0.8</b>  |
| <b>New Zealand*</b>          |        |       |             |        |             |     |            |     |             |     |            |     |             |
| 1995-99                      | 1,251  | 353   | <b>28.2</b> | 789    | <b>63.1</b> | 31  | <b>2.5</b> | 18  | <b>1.4</b>  | 26  | <b>2.1</b> | 34  | <b>2.7</b>  |
| 2000-04                      | 1,247  | 305   | <b>24.5</b> | 838    | <b>67.2</b> | 35  | <b>2.8</b> | 19  | <b>1.5</b>  | 38  | <b>3.0</b> | 12  | <b>1.0</b>  |
| 2005-09                      | 1,432  | 288   | <b>20.1</b> | 1,027  | <b>71.7</b> | 40  | <b>2.8</b> | 11  | <b>0.8</b>  | 38  | <b>2.7</b> | 28  | <b>2.0</b>  |



**Supplementary Table 5.**

| Period of diagnosis                | Type I epithelial |            |            |                           |             |          |             |          |     |                   |            | Type II epithelial  |             |                          |            |                                       |             |
|------------------------------------|-------------------|------------|------------|---------------------------|-------------|----------|-------------|----------|-----|-------------------|------------|---------------------|-------------|--------------------------|------------|---------------------------------------|-------------|
|                                    | Total<br>No.      | Clear Cell |            | Endometrioid <sup>b</sup> |             | Mucinous |             | Squamous |     | Transitional cell |            | Serous <sup>c</sup> |             | Mixed epithelial-stromal |            | Undifferentiated and other epithelial |             |
|                                    |                   | No.        | No.        | %                         | No.         | %        | No.         | %        | No. | %                 | No.        | %                   | No.         | %                        | No.        | %                                     | No.         |
| <b>AMERICA (CENTRAL AND SOUTH)</b> |                   |            |            |                           |             |          |             |          |     |                   |            |                     |             |                          |            |                                       |             |
| <b>Argentinian registries</b>      |                   |            |            |                           |             |          |             |          |     |                   |            |                     |             |                          |            |                                       |             |
| 1995-99                            | -                 | -          | .          | -                         | .           | -        | .           | -        | .   | -                 | .          | -                   | .           | -                        | .          | -                                     | .           |
| 2000-04                            | 182               | 2          | <b>1.1</b> | 11                        | <b>6.0</b>  | 24       | <b>13.2</b> | -        | .   | 2                 | <b>1.1</b> | 48                  | <b>26.4</b> | 1                        | <b>0.5</b> | 68                                    | <b>37.4</b> |
| 2005-09                            | 598               | 7          | <b>1.2</b> | 37                        | <b>6.2</b>  | 62       | <b>10.4</b> | 5        | 0.8 | 1                 | <b>0.2</b> | 159                 | <b>26.6</b> | 7                        | <b>1.2</b> | 237                                   | <b>39.6</b> |
| <b>Brazilian registries</b>        |                   |            |            |                           |             |          |             |          |     |                   |            |                     |             |                          |            |                                       |             |
| 1995-99                            | 168               | 4          | <b>2.4</b> | 19                        | <b>11.3</b> | 24       | <b>14.3</b> | 2        | 1.2 | -                 | .          | 41                  | <b>24.4</b> | 1                        | <b>0.6</b> | 50                                    | <b>29.8</b> |
| 2000-04                            | 434               | 5          | <b>1.2</b> | 40                        | <b>9.2</b>  | 46       | <b>10.6</b> | 4        | 0.9 | 1                 | <b>0.2</b> | 126                 | <b>29.0</b> | 1                        | <b>0.2</b> | 154                                   | <b>35.5</b> |
| 2005-09                            | 252               | 10         | <b>4.0</b> | 16                        | <b>6.3</b>  | 33       | <b>13.1</b> | -        | .   | 1                 | <b>0.4</b> | 92                  | <b>36.5</b> | 1                        | <b>0.4</b> | 67                                    | <b>26.6</b> |
| <b>Colombia (Cali)</b>             |                   |            |            |                           |             |          |             |          |     |                   |            |                     |             |                          |            |                                       |             |
| 1995-99                            | 302               | 5          | <b>1.7</b> | 33                        | <b>10.9</b> | 39       | <b>12.9</b> | 1        | 0.3 | -                 | .          | 102                 | <b>33.8</b> | 3                        | <b>1.0</b> | 76                                    | <b>25.2</b> |
| 2000-04                            | 337               | 11         | <b>3.3</b> | 34                        | <b>10.1</b> | 37       | <b>11.0</b> | 2        | 0.6 | 2                 | <b>0.6</b> | 122                 | <b>36.2</b> | 2                        | <b>0.6</b> | 80                                    | <b>23.7</b> |
| 2005-09                            | 335               | 14         | <b>4.2</b> | 29                        | <b>8.7</b>  | 36       | <b>10.7</b> | 2        | 0.6 | -                 | .          | 120                 | <b>35.8</b> | 5                        | <b>1.5</b> | 91                                    | <b>27.2</b> |
| <b>Cuba*</b>                       |                   |            |            |                           |             |          |             |          |     |                   |            |                     |             |                          |            |                                       |             |
| 1995-99                            | 455               | 4          | <b>0.9</b> | 47                        | <b>10.3</b> | 15       | <b>3.3</b>  | 3        | 0.7 | 2                 | <b>0.4</b> | 65                  | <b>14.3</b> | 4                        | <b>0.9</b> | 251                                   | <b>55.2</b> |
| 2000-04                            | 1,464             | 10         | <b>0.7</b> | 35                        | <b>2.4</b>  | 109      | <b>7.4</b>  | 27       | 1.8 | 6                 | <b>0.4</b> | 235                 | <b>16.1</b> | 7                        | <b>0.5</b> | 818                                   | <b>55.9</b> |
| 2005-09                            | 560               | 6          | <b>1.1</b> | 82                        | <b>14.6</b> | 28       | <b>5.0</b>  | 12       | 2.1 | 2                 | <b>0.4</b> | 99                  | <b>17.7</b> | 1                        | <b>0.2</b> | 271                                   | <b>48.4</b> |
| <b>Ecuador (Quito)</b>             |                   |            |            |                           |             |          |             |          |     |                   |            |                     |             |                          |            |                                       |             |
| 1995-99                            | 188               | 2          | <b>1.1</b> | 7                         | <b>3.7</b>  | 13       | <b>6.9</b>  | -        | .   | -                 | .          | 67                  | <b>35.6</b> | 2                        | <b>1.1</b> | 58                                    | <b>30.9</b> |
| 2000-04                            | 209               | 4          | <b>1.9</b> | 9                         | <b>4.3</b>  | 18       | <b>8.6</b>  | -        | .   | 1                 | <b>0.5</b> | 64                  | <b>30.6</b> | 1                        | <b>0.5</b> | 68                                    | <b>32.5</b> |
| 2005-09                            | 270               | 6          | <b>2.2</b> | 13                        | <b>4.8</b>  | 24       | <b>8.9</b>  | -        | .   | -                 | .          | 89                  | <b>33.0</b> | 4                        | <b>1.5</b> | 80                                    | <b>29.6</b> |





|                        |       |     |             |     |             |     |             |    |     |    |            |       |             |     |            |       |             |
|------------------------|-------|-----|-------------|-----|-------------|-----|-------------|----|-----|----|------------|-------|-------------|-----|------------|-------|-------------|
| <b>Taiwan*</b>         |       |     |             |     |             |     |             |    |     |    |            |       |             |     |            |       |             |
| 1995-99                | 2,768 | 222 | <b>8.0</b>  | 359 | <b>13.0</b> | 471 | <b>17.0</b> | 28 | 1.0 | 18 | <b>0.7</b> | 668   | <b>24.1</b> | 19  | <b>0.7</b> | 490   | <b>17.7</b> |
| 2000-04                | 3,998 | 386 | <b>9.7</b>  | 537 | <b>13.4</b> | 579 | <b>14.5</b> | 41 | 1.0 | 25 | <b>0.6</b> | 1,108 | <b>27.7</b> | 51  | <b>1.3</b> | 624   | <b>15.6</b> |
| 2005-09                | 5,165 | 690 | <b>13.4</b> | 652 | <b>12.6</b> | 676 | <b>13.1</b> | 43 | 0.8 | 51 | <b>1.0</b> | 1,495 | <b>28.9</b> | 187 | <b>3.6</b> | 718   | <b>13.9</b> |
| <b>Thai registries</b> |       |     |             |     |             |     |             |    |     |    |            |       |             |     |            |       |             |
| 1995-99                | 171   | 6   | <b>3.5</b>  | 6   | <b>3.5</b>  | 57  | <b>33.3</b> | 7  | 4.1 | -  | .          | 28    | <b>16.4</b> | 1   | <b>0.6</b> | 41    | <b>24.0</b> |
| 2000-04                | 478   | 50  | <b>10.5</b> | 48  | <b>10.0</b> | 106 | <b>22.2</b> | 12 | 2.5 | 2  | <b>0.4</b> | 120   | <b>25.1</b> | 8   | <b>1.7</b> | 72    | <b>15.1</b> |
| 2005-09                | 549   | 63  | <b>11.5</b> | 79  | <b>14.4</b> | 99  | <b>18.0</b> | 6  | 1.1 | 5  | <b>0.9</b> | 117   | <b>21.3</b> | 15  | <b>2.7</b> | 90    | <b>16.4</b> |
| <b>Turkey (Izmir)</b>  |       |     |             |     |             |     |             |    |     |    |            |       |             |     |            |       |             |
| 1995-99                | 390   | 29  | <b>7.4</b>  | 54  | <b>13.8</b> | 39  | <b>10.0</b> | 3  | 0.8 | 0  | .          | 167   | <b>42.8</b> | 6   | <b>1.5</b> | 44    | <b>11.3</b> |
| 2000-04                | 527   | 30  | <b>5.7</b>  | 60  | <b>11.4</b> | 48  | <b>9.1</b>  | 4  | 0.8 | 3  | <b>0.6</b> | 235   | <b>44.6</b> | 23  | <b>4.4</b> | 65    | <b>12.3</b> |
| 2005-09                | 699   | 31  | <b>4.4</b>  | 68  | <b>9.7</b>  | 61  | <b>8.7</b>  | 3  | 0.4 | 2  | <b>0.3</b> | 328   | <b>46.9</b> | 40  | <b>5.7</b> | 80    | <b>11.4</b> |
| <b>EUROPE</b>          |       |     |             |     |             |     |             |    |     |    |            |       |             |     |            |       |             |
| <b>Austria*</b>        |       |     |             |     |             |     |             |    |     |    |            |       |             |     |            |       |             |
| 1995-99                | 4,331 | 50  | <b>1.2</b>  | 290 | <b>6.7</b>  | 295 | <b>6.8</b>  | 17 | 0.4 | 22 | <b>0.5</b> | 1,161 | <b>26.8</b> | 77  | <b>1.8</b> | 2,049 | <b>47.3</b> |
| 2000-04                | 4,180 | 47  | <b>1.1</b>  | 293 | <b>7.0</b>  | 236 | <b>5.6</b>  | 19 | 0.5 | 8  | <b>0.2</b> | 1,255 | <b>30.0</b> | 69  | <b>1.7</b> | 1,844 | <b>44.1</b> |
| 2005-09                | 3,653 | 57  | <b>1.6</b>  | 290 | <b>7.9</b>  | 176 | <b>4.8</b>  | 18 | 0.5 | 11 | <b>0.3</b> | 1,254 | <b>34.3</b> | 68  | <b>1.9</b> | 1,422 | <b>38.9</b> |
| <b>Belgium*</b>        |       |     |             |     |             |     |             |    |     |    |            |       |             |     |            |       |             |
| 1995-99                | -     | -   | .           | -   | .           | -   | .           | -  | .   | -  | .          | -     | .           | -   | .          | -     | .           |
| 2000-04                | 948   | 37  | <b>3.9</b>  | 91  | <b>9.6</b>  | 94  | <b>9.9</b>  | 3  | 0.3 | 3  | <b>0.3</b> | 444   | <b>46.8</b> | 25  | <b>2.6</b> | 184   | <b>19.4</b> |
| 2005-09                | 4,720 | 155 | <b>3.3</b>  | 350 | <b>7.4</b>  | 430 | <b>9.1</b>  | 20 | 0.4 | 25 | <b>0.5</b> | 2,539 | <b>53.8</b> | 123 | <b>2.6</b> | 782   | <b>16.6</b> |
| <b>Bulgaria*</b>       |       |     |             |     |             |     |             |    |     |    |            |       |             |     |            |       |             |
| 1995-99                | 2,792 | 78  | <b>2.8</b>  | 101 | <b>3.6</b>  | 243 | <b>8.7</b>  | 18 | 0.6 | 8  | <b>0.3</b> | 832   | <b>29.8</b> | 19  | <b>0.7</b> | 1,194 | <b>42.8</b> |
| 2000-04                | 3,368 | 93  | <b>2.8</b>  | 149 | <b>4.4</b>  | 421 | <b>12.5</b> | 20 | 0.6 | 8  | <b>0.2</b> | 1,174 | <b>34.9</b> | 23  | <b>0.7</b> | 1,126 | <b>33.4</b> |
| 2005-09                | 3,933 | 64  | <b>1.6</b>  | 211 | <b>5.4</b>  | 486 | <b>12.4</b> | 9  | 0.2 | 15 | <b>0.4</b> | 1,571 | <b>39.9</b> | 25  | <b>0.6</b> | 1,154 | <b>29.3</b> |
| <b>Croatia*</b>        |       |     |             |     |             |     |             |    |     |    |            |       |             |     |            |       |             |
| 1995-99                | 771   | 2   | <b>0.3</b>  | 58  | <b>7.5</b>  | 71  | <b>9.2</b>  | 5  | 0.6 | 2  | <b>0.3</b> | 134   | <b>17.4</b> | 1   | <b>0.1</b> | 462   | <b>59.9</b> |
| 2000-04                | 1,998 | 16  | <b>0.8</b>  | 227 | <b>11.4</b> | 173 | <b>8.7</b>  | 10 | 0.5 | 2  | <b>0.1</b> | 558   | <b>27.9</b> | 19  | <b>1.0</b> | 914   | <b>45.7</b> |
| 2005-09                | 1,930 | 51  | <b>2.6</b>  | 204 | <b>10.6</b> | 162 | <b>8.4</b>  | 6  | 0.3 | 5  | <b>0.3</b> | 752   | <b>39.0</b> | 24  | <b>1.2</b> | 646   | <b>33.5</b> |

|                          |        |     |            |     |             |     |             |    |     |    |            |       |             |     |            |       |             |
|--------------------------|--------|-----|------------|-----|-------------|-----|-------------|----|-----|----|------------|-------|-------------|-----|------------|-------|-------------|
| <b>Czech Republic*</b>   |        |     |            |     |             |     |             |    |     |    |            |       |             |     |            |       |             |
| 1995-99                  | 5,223  | 91  | <b>1.7</b> | 560 | <b>10.7</b> | 639 | <b>12.2</b> | 30 | 0.6 | 19 | <b>0.4</b> | 2,011 | <b>38.5</b> | 46  | <b>0.9</b> | 1,273 | <b>24.4</b> |
| 2000-04                  | 5,502  | 97  | <b>1.8</b> | 661 | <b>12.0</b> | 557 | <b>10.1</b> | 35 | 0.6 | 16 | <b>0.3</b> | 2,084 | <b>37.9</b> | 70  | <b>1.3</b> | 1,411 | <b>25.6</b> |
| 2005-09                  | 5,220  | 112 | <b>2.1</b> | 490 | <b>9.4</b>  | 414 | <b>7.9</b>  | 43 | 0.8 | 31 | <b>0.6</b> | 2,275 | <b>43.6</b> | 107 | <b>2.0</b> | 1,250 | <b>23.9</b> |
| <b>Denmark*</b>          |        |     |            |     |             |     |             |    |     |    |            |       |             |     |            |       |             |
| 1995-99                  | 3,068  | 123 | <b>4.0</b> | 345 | <b>11.2</b> | 300 | <b>9.8</b>  | 18 | 0.6 | 10 | <b>0.3</b> | 1,238 | <b>40.4</b> | 89  | <b>2.9</b> | 753   | <b>24.5</b> |
| 2000-04                  | 2,991  | 137 | <b>4.6</b> | 308 | <b>10.3</b> | 279 | <b>9.3</b>  | 16 | 0.5 | 10 | <b>0.3</b> | 1,310 | <b>43.8</b> | 75  | <b>2.5</b> | 665   | <b>22.2</b> |
| 2005-09                  | 2,997  | 107 | <b>3.6</b> | 260 | <b>8.7</b>  | 235 | <b>7.8</b>  | 12 | 0.4 | 19 | <b>0.6</b> | 1,577 | <b>52.6</b> | 101 | <b>3.4</b> | 483   | <b>16.1</b> |
| <b>Estonia*</b>          |        |     |            |     |             |     |             |    |     |    |            |       |             |     |            |       |             |
| 1995-99                  | 792    | 19  | <b>2.4</b> | 25  | <b>3.2</b>  | 83  | <b>10.5</b> | 5  | 0.6 | 1  | <b>0.1</b> | 317   | <b>40.0</b> | 5   | <b>0.6</b> | 189   | <b>23.9</b> |
| 2000-04                  | 710    | 15  | <b>2.1</b> | 17  | <b>2.4</b>  | 82  | <b>11.5</b> | 1  | 0.1 | 1  | <b>0.1</b> | 368   | <b>51.8</b> | 9   | <b>1.3</b> | 118   | <b>16.6</b> |
| 2005-09                  | 613    | 20  | <b>3.3</b> | 25  | <b>4.1</b>  | 42  | <b>6.9</b>  | 4  | 0.7 | 4  | <b>0.7</b> | 316   | <b>51.5</b> | 4   | <b>0.7</b> | 112   | <b>18.3</b> |
| <b>Finland*</b>          |        |     |            |     |             |     |             |    |     |    |            |       |             |     |            |       |             |
| 1995-99                  | 2,325  | 91  | <b>3.9</b> | 503 | <b>21.6</b> | 295 | <b>12.7</b> | 11 | 0.5 | 1  | <b>0.0</b> | 992   | <b>42.7</b> | 46  | <b>2.0</b> | 228   | <b>9.8</b>  |
| 2000-04                  | 2,512  | 116 | <b>4.6</b> | 480 | <b>19.1</b> | 282 | <b>11.2</b> | 8  | 0.3 | 9  | <b>0.4</b> | 1,142 | <b>45.5</b> | 44  | <b>1.8</b> | 245   | <b>9.8</b>  |
| 2005-09                  | 2,485  | 130 | <b>5.2</b> | 315 | <b>12.7</b> | 249 | <b>10.0</b> | 5  | 0.2 | 13 | <b>0.5</b> | 1,283 | <b>51.6</b> | 45  | <b>1.8</b> | 233   | <b>9.4</b>  |
| <b>French registries</b> |        |     |            |     |             |     |             |    |     |    |            |       |             |     |            |       |             |
| 1995-99                  | 2,495  | 80  | <b>3.2</b> | 225 | <b>9.0</b>  | 264 | <b>10.6</b> | 6  | 0.2 | 5  | <b>0.2</b> | 1,112 | <b>44.6</b> | 40  | <b>1.6</b> | 572   | <b>22.9</b> |
| 2000-04                  | 2,870  | 80  | <b>2.8</b> | 258 | <b>9.0</b>  | 253 | <b>8.8</b>  | 13 | 0.5 | 17 | <b>0.6</b> | 1,351 | <b>47.1</b> | 70  | <b>2.4</b> | 614   | <b>21.4</b> |
| 2005-09                  | 242    | 10  | <b>4.1</b> | 35  | <b>14.5</b> | 14  | <b>5.8</b>  | 1  | 0.4 | 2  | <b>0.8</b> | 109   | <b>45.0</b> | 4   | <b>1.7</b> | 50    | <b>20.7</b> |
| <b>German registries</b> |        |     |            |     |             |     |             |    |     |    |            |       |             |     |            |       |             |
| 1995-99                  | 5,295  | 82  | <b>1.5</b> | 335 | <b>6.3</b>  | 454 | <b>8.6</b>  | 24 | 0.5 | 17 | <b>0.3</b> | 1,593 | <b>30.1</b> | 89  | <b>1.7</b> | 2,321 | <b>43.8</b> |
| 2000-04                  | 9,047  | 163 | <b>1.8</b> | 662 | <b>7.3</b>  | 672 | <b>7.4</b>  | 34 | 0.4 | 43 | <b>0.5</b> | 3,646 | <b>40.3</b> | 183 | <b>2.0</b> | 3,092 | <b>34.2</b> |
| 2005-09                  | 10,566 | 199 | <b>1.9</b> | 774 | <b>7.3</b>  | 724 | <b>6.9</b>  | 62 | 0.6 | 50 | <b>0.5</b> | 4,971 | <b>47.0</b> | 204 | <b>1.9</b> | 3,048 | <b>28.8</b> |
| <b>Iceland*</b>          |        |     |            |     |             |     |             |    |     |    |            |       |             |     |            |       |             |
| 1995-99                  | 113    | 3   | <b>2.7</b> | 7   | <b>6.2</b>  | 9   | <b>8.0</b>  | 1  | 0.9 | 1  | <b>0.9</b> | 58    | <b>51.3</b> | 1   | <b>0.9</b> | 27    | <b>23.9</b> |
| 2000-04                  | 127    | 9   | <b>7.1</b> | 9   | <b>7.1</b>  | 6   | <b>4.7</b>  | -  | .   | -  | .          | 72    | <b>56.7</b> | 2   | <b>1.6</b> | 20    | <b>15.7</b> |
| 2005-09                  | 118    | 1   | <b>0.8</b> | 10  | <b>8.5</b>  | 9   | <b>7.6</b>  | -  | .   | -  | .          | 71    | <b>60.2</b> | 3   | <b>2.5</b> | 16    | <b>13.6</b> |

|                           |       |     |            |     |             |     |             |    |     |    |            |       |             |     |            |       |             |
|---------------------------|-------|-----|------------|-----|-------------|-----|-------------|----|-----|----|------------|-------|-------------|-----|------------|-------|-------------|
| <b>Ireland*</b>           |       |     |            |     |             |     |             |    |     |    |            |       |             |     |            |       |             |
| 1995-99                   | 1,332 | 42  | <b>3.2</b> | 104 | <b>7.8</b>  | 169 | <b>12.7</b> | 5  | 0.4 | 3  | <b>0.2</b> | 485   | <b>36.4</b> | 27  | <b>2.0</b> | 436   | <b>32.7</b> |
| 2000-04                   | 1,477 | 78  | <b>5.3</b> | 130 | <b>8.8</b>  | 161 | <b>10.9</b> | 4  | 0.3 | 2  | <b>0.1</b> | 525   | <b>35.5</b> | 34  | <b>2.3</b> | 484   | <b>32.8</b> |
| 2005-09                   | 1,607 | 83  | <b>5.2</b> | 153 | <b>9.5</b>  | 134 | <b>8.3</b>  | 8  | 0.5 | 4  | <b>0.2</b> | 649   | <b>40.4</b> | 59  | <b>3.7</b> | 438   | <b>27.3</b> |
| <b>Italian registries</b> |       |     |            |     |             |     |             |    |     |    |            |       |             |     |            |       |             |
| 1995-99                   | 6,772 | 153 | <b>2.3</b> | 568 | <b>8.4</b>  | 596 | <b>8.8</b>  | 44 | 0.6 | 23 | <b>0.3</b> | 2,215 | <b>32.7</b> | 109 | <b>1.6</b> | 2,387 | <b>35.2</b> |
| 2000-04                   | 8,394 | 229 | <b>2.7</b> | 763 | <b>9.1</b>  | 661 | <b>7.9</b>  | 45 | 0.5 | 26 | <b>0.3</b> | 3,112 | <b>37.1</b> | 215 | <b>2.6</b> | 2,484 | <b>29.6</b> |
| 2005-09                   | 5,087 | 152 | <b>3.0</b> | 529 | <b>10.4</b> | 364 | <b>7.2</b>  | 37 | 0.7 | 22 | <b>0.4</b> | 1,942 | <b>38.2</b> | 122 | <b>2.4</b> | 1,384 | <b>27.2</b> |
| <b>Latvia*</b>            |       |     |            |     |             |     |             |    |     |    |            |       |             |     |            |       |             |
| 1995-99                   | 1,219 | 13  | <b>1.1</b> | 13  | <b>1.1</b>  | 35  | <b>2.9</b>  | 8  | 0.7 | 2  | <b>0.2</b> | 361   | <b>29.6</b> | 1   | <b>0.1</b> | 702   | <b>57.6</b> |
| 2000-04                   | 1,205 | 13  | <b>1.1</b> | 25  | <b>2.1</b>  | 60  | <b>5.0</b>  | 4  | 0.3 | 2  | <b>0.2</b> | 363   | <b>30.1</b> | 5   | <b>0.4</b> | 645   | <b>53.5</b> |
| 2005-09                   | 1,233 | 23  | <b>1.9</b> | 30  | <b>2.4</b>  | 69  | <b>5.6</b>  | 10 | 0.8 | 7  | <b>0.6</b> | 448   | <b>36.3</b> | 1   | <b>0.1</b> | 524   | <b>42.5</b> |
| <b>Lithuania*</b>         |       |     |            |     |             |     |             |    |     |    |            |       |             |     |            |       |             |
| 1995-99                   | 1,630 | 14  | <b>0.9</b> | 15  | <b>0.9</b>  | 38  | <b>2.3</b>  | 47 | 2.9 | 2  | <b>0.1</b> | 232   | <b>14.2</b> | 12  | <b>0.7</b> | 1,123 | <b>68.9</b> |
| 2000-04                   | 1,781 | 29  | <b>1.6</b> | 70  | <b>3.9</b>  | 87  | <b>4.9</b>  | 15 | 0.8 | 2  | <b>0.1</b> | 409   | <b>23.0</b> | 3   | <b>0.2</b> | 1,016 | <b>57.0</b> |
| 2005-09                   | 1,780 | 45  | <b>2.5</b> | 121 | <b>6.8</b>  | 114 | <b>6.4</b>  | 6  | 0.3 | 9  | <b>0.5</b> | 812   | <b>45.6</b> | 9   | <b>0.5</b> | 525   | <b>29.5</b> |
| <b>Malta*</b>             |       |     |            |     |             |     |             |    |     |    |            |       |             |     |            |       |             |
| 1995-99                   | 149   | 7   | <b>4.7</b> | 10  | <b>6.7</b>  | 33  | <b>22.1</b> | -  | .   | -  | .          | 40    | <b>26.8</b> | 4   | <b>2.7</b> | 41    | <b>27.5</b> |
| 2000-04                   | 197   | 12  | <b>6.1</b> | 22  | <b>11.2</b> | 26  | <b>13.2</b> | -  | .   | -  | .          | 59    | <b>29.9</b> | -   | .          | 54    | <b>27.4</b> |
| 2005-09                   | 191   | 7   | <b>3.7</b> | 22  | <b>11.5</b> | 18  | <b>9.4</b>  | -  | .   | -  | .          | 51    | <b>26.7</b> | 5   | <b>2.6</b> | 64    | <b>33.5</b> |
| <b>Netherlands*</b>       |       |     |            |     |             |     |             |    |     |    |            |       |             |     |            |       |             |
| 1995-99                   | 6,624 | 266 | <b>4.0</b> | 609 | <b>9.2</b>  | 793 | <b>12.0</b> | 18 | 0.3 | 28 | <b>0.4</b> | 2,235 | <b>33.7</b> | 153 | <b>2.3</b> | 2,096 | <b>31.6</b> |
| 2000-04                   | 6,289 | 285 | <b>4.5</b> | 590 | <b>9.4</b>  | 593 | <b>9.4</b>  | 15 | 0.2 | 25 | <b>0.4</b> | 2,497 | <b>39.7</b> | 168 | <b>2.7</b> | 1,720 | <b>27.3</b> |
| 2005-09                   | 6,403 | 311 | <b>4.9</b> | 613 | <b>9.6</b>  | 469 | <b>7.3</b>  | 15 | 0.2 | 29 | <b>0.5</b> | 2,964 | <b>46.3</b> | 150 | <b>2.3</b> | 1,517 | <b>23.7</b> |
| <b>Norway*</b>            |       |     |            |     |             |     |             |    |     |    |            |       |             |     |            |       |             |
| 1995-99                   | 2,358 | 118 | <b>5.0</b> | 247 | <b>10.5</b> | 159 | <b>6.7</b>  | 6  | 0.3 | 4  | <b>0.2</b> | 1,067 | <b>45.3</b> | 44  | <b>1.9</b> | 528   | <b>22.4</b> |
| 2000-04                   | 2,506 | 102 | <b>4.1</b> | 238 | <b>9.5</b>  | 186 | <b>7.4</b>  | 2  | 0.1 | 6  | <b>0.2</b> | 1,163 | <b>46.4</b> | 68  | <b>2.7</b> | 552   | <b>22.0</b> |
| 2005-09                   | 2,416 | 85  | <b>3.5</b> | 171 | <b>7.1</b>  | 119 | <b>4.9</b>  | 8  | 0.3 | 2  | <b>0.1</b> | 1,257 | <b>52.0</b> | 44  | <b>1.8</b> | 547   | <b>22.6</b> |

|                             |        |     |            |       |             |       |             |    |     |    |            |       |             |     |            |       |             |
|-----------------------------|--------|-----|------------|-------|-------------|-------|-------------|----|-----|----|------------|-------|-------------|-----|------------|-------|-------------|
| <b>Poland</b>               |        |     |            |       |             |       |             |    |     |    |            |       |             |     |            |       |             |
| 1995-99                     | 3,158  | 64  | <b>2.0</b> | 281   | <b>8.9</b>  | 304   | <b>9.6</b>  | 20 | 0.6 | 14 | <b>0.4</b> | 949   | <b>30.1</b> | 63  | <b>2.0</b> | 1,165 | <b>36.9</b> |
| 2000-04                     | 13,114 | 219 | <b>1.7</b> | 1,561 | <b>11.9</b> | 1,118 | <b>8.5</b>  | 48 | 0.4 | 71 | <b>0.5</b> | 4,668 | <b>35.6</b> | 136 | <b>1.0</b> | 4,141 | <b>31.6</b> |
| 2005-09                     | 14,837 | 263 | <b>1.8</b> | 1,859 | <b>12.5</b> | 1,213 | <b>8.2</b>  | 42 | 0.3 | 78 | <b>0.5</b> | 5,956 | <b>40.1</b> | 215 | <b>1.4</b> | 4,035 | <b>27.2</b> |
| <b>Portugal*</b>            |        |     |            |       |             |       |             |    |     |    |            |       |             |     |            |       |             |
| 1995-99                     | 574    | 18  | <b>3.1</b> | 39    | <b>6.8</b>  | 56    | <b>9.8</b>  | 3  | 0.5 | 4  | <b>0.7</b> | 174   | <b>30.3</b> | 8   | <b>1.4</b> | 210   | <b>36.6</b> |
| 2000-04                     | 2,153  | 63  | <b>2.9</b> | 142   | <b>6.6</b>  | 217   | <b>10.1</b> | 29 | 1.3 | 3  | <b>0.1</b> | 680   | <b>31.6</b> | 40  | <b>1.9</b> | 777   | <b>36.1</b> |
| 2005-09                     | 1,978  | 53  | <b>2.7</b> | 168   | <b>8.5</b>  | 166   | <b>8.4</b>  | 21 | 1.1 | 11 | <b>0.6</b> | 614   | <b>31.0</b> | 54  | <b>2.7</b> | 720   | <b>36.4</b> |
| <b>Romania (Cluj)</b>       |        |     |            |       |             |       |             |    |     |    |            |       |             |     |            |       |             |
| 1995-99                     | -      | -   | .          | -     | .           | -     | .           | -  | .   | -  | .          | -     | .           | -   | .          | -     | .           |
| 2000-04                     | -      | -   | .          | -     | .           | -     | .           | -  | .   | -  | .          | -     | .           | -   | .          | -     | .           |
| 2005-09                     | 196    | 4   | <b>2.0</b> | 21    | <b>10.7</b> | 14    | <b>7.1</b>  | 4  | 2.0 | 4  | <b>2.0</b> | 102   | <b>52.0</b> | 1   | <b>0.5</b> | 26    | <b>13.3</b> |
| <b>Russia (Arkhangelsk)</b> |        |     |            |       |             |       |             |    |     |    |            |       |             |     |            |       |             |
| 1995-99                     | -      | -   | .          | -     | .           | -     | .           | -  | .   | -  | .          | -     | .           | -   | .          | -     | .           |
| 2000-04                     | 440    | 12  | <b>2.7</b> | 11    | <b>2.5</b>  | 41    | <b>9.3</b>  | 4  | 0.9 | 8  | <b>1.8</b> | 125   | <b>28.4</b> | 1   | <b>0.2</b> | 129   | <b>29.3</b> |
| 2005-09                     | 402    | 7   | <b>1.7</b> | 25    | <b>6.2</b>  | 33    | <b>8.2</b>  | 3  | 0.7 | 8  | <b>2.0</b> | 90    | <b>22.4</b> | 3   | <b>0.7</b> | 109   | <b>27.1</b> |
| <b>Slovakia*</b>            |        |     |            |       |             |       |             |    |     |    |            |       |             |     |            |       |             |
| 1995-99                     | -      | -   | .          | -     | .           | -     | .           | -  | .   | -  | .          | -     | .           | -   | .          | -     | .           |
| 2000-04                     | 1,983  | 69  | <b>3.5</b> | 214   | <b>10.8</b> | 261   | <b>13.2</b> | 4  | 0.2 | 7  | <b>0.4</b> | 834   | <b>42.1</b> | 18  | <b>0.9</b> | 391   | <b>19.7</b> |
| 2005-09                     | 1,339  | 45  | <b>3.4</b> | 156   | <b>11.7</b> | 142   | <b>10.6</b> | 4  | 0.3 | 4  | <b>0.3</b> | 606   | <b>45.3</b> | 21  | <b>1.6</b> | 241   | <b>18.0</b> |
| <b>Slovenia*</b>            |        |     |            |       |             |       |             |    |     |    |            |       |             |     |            |       |             |
| 1995-99                     | 824    | 20  | <b>2.4</b> | 119   | <b>14.4</b> | 52    | <b>6.3</b>  | 2  | 0.2 | 1  | <b>0.1</b> | 344   | <b>41.7</b> | 6   | <b>0.7</b> | 217   | <b>26.3</b> |
| 2000-04                     | 911    | 39  | <b>4.3</b> | 134   | <b>14.7</b> | 58    | <b>6.4</b>  | 3  | 0.3 | 2  | <b>0.2</b> | 429   | <b>47.1</b> | 29  | <b>3.2</b> | 146   | <b>16.0</b> |
| 2005-09                     | 986    | 38  | <b>3.9</b> | 151   | <b>15.3</b> | 61    | <b>6.2</b>  | 1  | 0.1 | 5  | <b>0.5</b> | 526   | <b>53.3</b> | 23  | <b>2.3</b> | 128   | <b>13.0</b> |
| <b>Spanish registries</b>   |        |     |            |       |             |       |             |    |     |    |            |       |             |     |            |       |             |
| 1995-99                     | 2,728  | 140 | <b>5.1</b> | 378   | <b>13.9</b> | 336   | <b>12.3</b> | 26 | 1.0 | 10 | <b>0.4</b> | 884   | <b>32.4</b> | 25  | <b>0.9</b> | 682   | <b>25.0</b> |
| 2000-04                     | 2,862  | 133 | <b>4.6</b> | 370   | <b>12.9</b> | 297   | <b>10.4</b> | 15 | 0.5 | 12 | <b>0.4</b> | 1,044 | <b>36.5</b> | 47  | <b>1.6</b> | 693   | <b>24.2</b> |
| 2005-09                     | 2,553  | 143 | <b>5.6</b> | 274   | <b>10.7</b> | 231   | <b>9.0</b>  | 5  | 0.2 | 21 | <b>0.8</b> | 1,030 | <b>40.3</b> | 59  | <b>2.3</b> | 586   | <b>23.0</b> |

|                              |        |       |            |       |             |       |             |     |     |    |            |        |             |     |            |        |             |
|------------------------------|--------|-------|------------|-------|-------------|-------|-------------|-----|-----|----|------------|--------|-------------|-----|------------|--------|-------------|
| <b>Swiss registries</b>      |        |       |            |       |             |       |             |     |     |    |            |        |             |     |            |        |             |
| 1995-99                      | 1,413  | 49    | <b>3.5</b> | 115   | <b>8.1</b>  | 147   | <b>10.4</b> | 9   | 0.6 | 5  | <b>0.4</b> | 644    | <b>45.6</b> | 44  | <b>3.1</b> | 314    | <b>22.2</b> |
| 2000-04                      | 1,376  | 45    | <b>3.3</b> | 138   | <b>10.0</b> | 96    | <b>7.0</b>  | 3   | 0.2 | 3  | <b>0.2</b> | 651    | <b>47.3</b> | 51  | <b>3.7</b> | 311    | <b>22.6</b> |
| 2005-09                      | 1,581  | 45    | <b>2.8</b> | 141   | <b>8.9</b>  | 88    | <b>5.6</b>  | 7   | 0.4 | 16 | <b>1.0</b> | 782    | <b>49.5</b> | 48  | <b>3.0</b> | 342    | <b>21.6</b> |
| <b>United Kingdom*</b>       |        |       |            |       |             |       |             |     |     |    |            |        |             |     |            |        |             |
| 1995-99                      | 28,070 | 1,065 | <b>3.8</b> | 2,632 | <b>9.4</b>  | 2,653 | <b>9.5</b>  | 117 | 0.4 | 74 | <b>0.3</b> | 7,579  | <b>27.0</b> | 619 | <b>2.2</b> | 12,075 | <b>43.0</b> |
| 2000-04                      | 29,950 | 1,330 | <b>4.4</b> | 2,578 | <b>8.6</b>  | 2,259 | <b>7.5</b>  | 137 | 0.5 | 67 | <b>0.2</b> | 9,179  | <b>30.6</b> | 804 | <b>2.7</b> | 12,250 | <b>40.9</b> |
| 2005-09                      | 29,700 | 1,440 | <b>4.8</b> | 2,071 | <b>7.0</b>  | 2,080 | <b>7.0</b>  | 140 | 0.5 | 52 | <b>0.2</b> | 10,923 | <b>36.8</b> | 943 | <b>3.2</b> | 10,640 | <b>35.8</b> |
| <b>OCEANIA</b>               |        |       |            |       |             |       |             |     |     |    |            |        |             |     |            |        |             |
| <b>Australian registries</b> |        |       |            |       |             |       |             |     |     |    |            |        |             |     |            |        |             |
| 1995-99                      | 5,281  | 265   | <b>5.0</b> | 422   | <b>8.0</b>  | 482   | <b>9.1</b>  | 21  | 0.4 | 13 | <b>0.2</b> | 2,347  | <b>44.4</b> | 191 | <b>3.6</b> | 1,219  | <b>23.1</b> |
| 2000-04                      | 5,895  | 295   | <b>5.0</b> | 458   | <b>7.8</b>  | 380   | <b>6.4</b>  | 12  | 0.2 | 16 | <b>0.3</b> | 2,788  | <b>47.3</b> | 282 | <b>4.8</b> | 1,293  | <b>21.9</b> |
| 2005-09                      | 4,954  | 259   | <b>5.2</b> | 372   | <b>7.5</b>  | 309   | <b>6.2</b>  | 12  | 0.2 | 19 | <b>0.4</b> | 2,482  | <b>50.1</b> | 217 | <b>4.4</b> | 945    | <b>19.1</b> |
| <b>New Zealand*</b>          |        |       |            |       |             |       |             |     |     |    |            |        |             |     |            |        |             |
| 1995-99                      | 1,251  | 50    | <b>4.0</b> | 125   | <b>10.0</b> | 158   | <b>12.6</b> | 14  | 1.1 | 6  | <b>0.5</b> | 437    | <b>34.9</b> | 45  | <b>3.6</b> | 307    | <b>24.5</b> |
| 2000-04                      | 1,247  | 60    | <b>4.8</b> | 133   | <b>10.7</b> | 91    | <b>7.3</b>  | 14  | 1.1 | 7  | <b>0.6</b> | 544    | <b>43.6</b> | 57  | <b>4.6</b> | 237    | <b>19.0</b> |
| 2005-09                      | 1,432  | 77    | <b>5.4</b> | 93    | <b>6.5</b>  | 89    | <b>6.2</b>  | 12  | 0.8 | 17 | <b>1.2</b> | 699    | <b>48.8</b> | 69  | <b>4.8</b> | 259    | <b>18.1</b> |
