# Supplementary material
Source: PubMed Central journal article supplement (PMC6195192)
Supplement: NIHMS79212-supplement-Supplementary_tables_and_figures_legends.pdf [file NIHMS79212-supplement-Supplementary_tables_and_figures_legends.pdf]

**Supplementary Table 1.** Distribution of ovarian cancer by morphological group and calendar period of diagnosis<sup>a</sup>

<sup>a</sup> Borderline tumours (ICD-O-3 codes: 8442, 8444, 8451, 8462, 8463, 8472, 8473) were excluded from the analysis of distribution of morphological subtypes (see text).

<sup>b</sup> No information on grade was available, therefore all endometrioid tumours were classified as type I epithelial.

<sup>c</sup> No information on grade was available, therefore all serous tumours were classified as type II epithelial.

<sup>d</sup> Morphologically verified tumours with ICD-O-3 morphology codes 8000-8004. Only countries with at least 100 women in any given time period were included. All tumours with a specific ICD-O-3 morphology code were included.

**Supplementary Table 2.** Distribution of type I and type II epithelial subtypes by calendar period of diagnosis<sup>a</sup>

<sup>a</sup> Borderline tumours (ICD-O-3 codes: 8442, 8444, 8451, 8462, 8463, 8472, 8473) were excluded from the analysis of distribution of morphological subtypes (see text).

<sup>b</sup> No information on grade was available, therefore all endometrioid tumours were classified as type I epithelial.

<sup>c</sup> No information on grade was available, therefore all serous tumours were classified as type II epithelial.

<sup>d</sup> Morphologically verified tumours with ICD-O-3 morphology codes 8000-8004. Only countries with at least 100 women in any given time period were included. All tumours with a specific ICD-O-3 morphology code were included.

**Supplementary Table 3.** Distribution of type I and type II epithelial subtypes by continent calendar period of diagnosis<sup>a</sup>

<sup>a</sup> Borderline tumours (ICD-O-3 codes: 8442, 8444, 8451, 8462, 8463, 8472, 8473) were excluded from the analysis of distribution of morphological subtypes (see text).

<sup>b</sup> No information on grade was available, therefore all endometrioid tumours were classified as type I epithelial.

<sup>c</sup> No information on grade was available, therefore all serous tumours were classified as type II epithelial.

<sup>d</sup> Morphologically verified tumours with ICD-O-3 morphology codes 8000-8004. Only countries with at least 100 women in any given time period were included. All tumours with a specific ICD-O-3 morphology code were included.

**Supplementary Table 4.** Distribution of morphological groups by country and calendar period of diagnosis<sup>a</sup>

<sup>a</sup> Borderline tumours (ICD-O-3 codes: 8442, 8444, 8451, 8462, 8463, 8472, 8473) were excluded from the analysis of distribution of morphological subtypes (see text).

<sup>b</sup> No information on grade was available, therefore all endometrioid tumours were classified as type I epithelial.

<sup>c</sup> No information on grade was available, therefore all serous tumours were classified as type II epithelial.

<sup>d</sup> Morphologically verified tumours with ICD-O-3 morphology codes 8000-8004. Only countries with at least 100 women in any given time period were included. All tumours with a specific ICD-O-3 morphology code were included.

**Supplementary Table 5.** Distribution of type I and type II epithelial subtypes by country and calendar period of diagnosis<sup>a</sup>

<sup>a</sup> Borderline tumours (ICD-O-3 codes: 8442, 8444, 8451, 8462, 8463, 8472, 8473) were excluded from the analysis of distribution of morphological subtypes (see text).

<sup>b</sup> No information on grade was available, therefore all endometrioid tumours were classified as type I epithelial.

<sup>c</sup> No information on grade was available, therefore all serous tumours were classified as type II epithelial.

<sup>d</sup> Morphologically verified tumours with ICD-O-3 morphology codes 8000-8004. Only countries with at least 100 women in any given time period were included. All tumours with a specific ICD-O-3 morphology code were included.

## **Supplementary Figure 1.** Flow chart of data exclusions

### **Supplementary Figure 2.** Morphological groups by ovarian cancer<sup>a</sup> by country (Central and South America), 2005-09

<sup>a</sup> Malignancies of the ovary (ICD-O-3 C56.9), fallopian tube, uterine ligaments and adnexa, and other and unspecified female genital organs (C57.0-C57.4, C57.7-C57.9), and peritoneum and retroperitoneum (C48.0-C48.2). Endometrioid tumours are classified as type I epithelial (see text). \*Data with 100% coverage of the national population.

### **Supplementary Figure 3.** Morphological groups of ovarian cancer<sup>a</sup> by country (North America), 2005-09

<sup>a</sup> Malignancies of the ovary (ICD-O-3 C56.9), fallopian tube, uterine ligaments and adnexa, and other and unspecified female genital organs (C57.0-C57.4, C57.7-C57.9), and peritoneum and retroperitoneum (C48.0-C48.2). Endometrioid tumours are classified as type I epithelial (see text). \*Data with 100% coverage of the national population.

### **Supplementary Figure 4.** Morphological groups of ovarian cancer<sup>a</sup> by country (Europe), 2005-09

<sup>a</sup> Malignancies of the ovary (ICD-O-3 C56.9), fallopian tube, uterine ligaments and adnexa, and other and unspecified female genital organs (C57.0-C57.4, C57.7-C57.9), and peritoneum and retroperitoneum (C48.0-C48.2). Endometrioid tumours are classified as type I epithelial (see text). \*Data with 100% coverage of the national population.

### **Supplementary Figure 5.** Morphological groups of ovarian cancer<sup>a</sup> by country (Oceania), 2005-09

<sup>a</sup> Malignancies of the ovary (ICD-O-3 C56.9), fallopian tube, uterine ligaments and adnexa, and other and unspecified female genital organs (C57.0-C57.4, C57.7-C57.9), and peritoneum and retroperitoneum (C48.0-C48.2). Endometrioid tumours are classified as type I epithelial (see text). \*Data with 100% coverage of the national population.
